# Supplementary material
Source: PubMed Central journal article supplement (PMC5518469)
Supplement: NIHMS840900-supplement-1.pdf [file NIHMS840900-supplement-1.pdf]

## Supplemental Figures

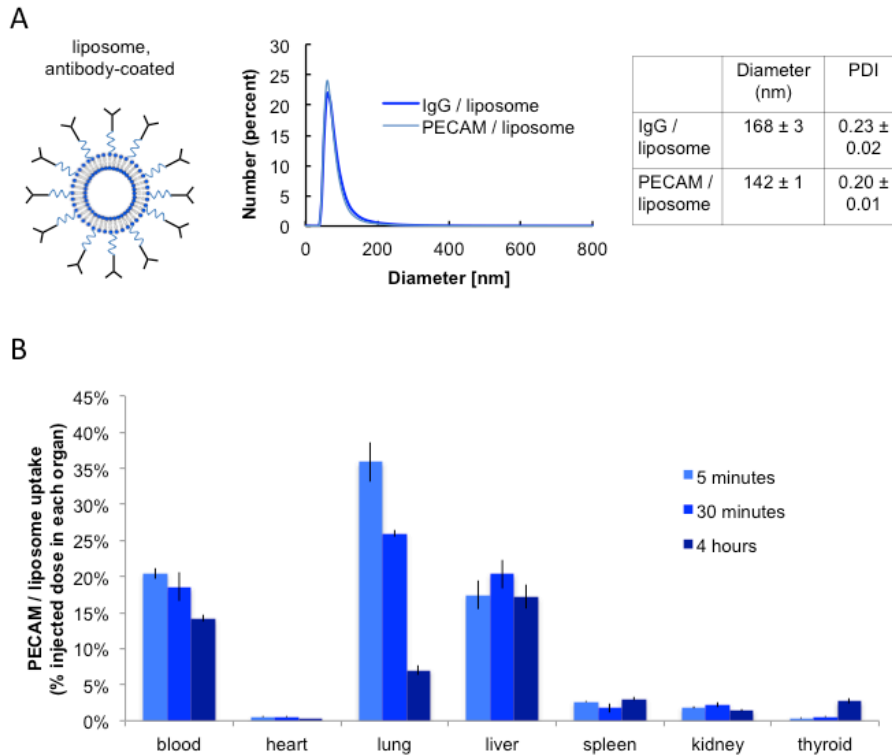

**Figure 1: Liposome characterization, biodistribution, and pharmacokinetics.** (A) *Left panel*, Diagram of liposomes, illustrating PEG linkers between the phospholipid bilayer and the attached antibodies. *Middle panel*, histogram of liposome size, as measured by dynamic light scattering (DLS). *Right panel*, statistics of size histogram in the middle panel. (B) Biodistribution of PECAM-targeted liposomes (PECAM / liposomes) as a function of the time between injection of liposomes and harvesting of organs (5 minutes to 4 hours). Mice were healthy (naïve).

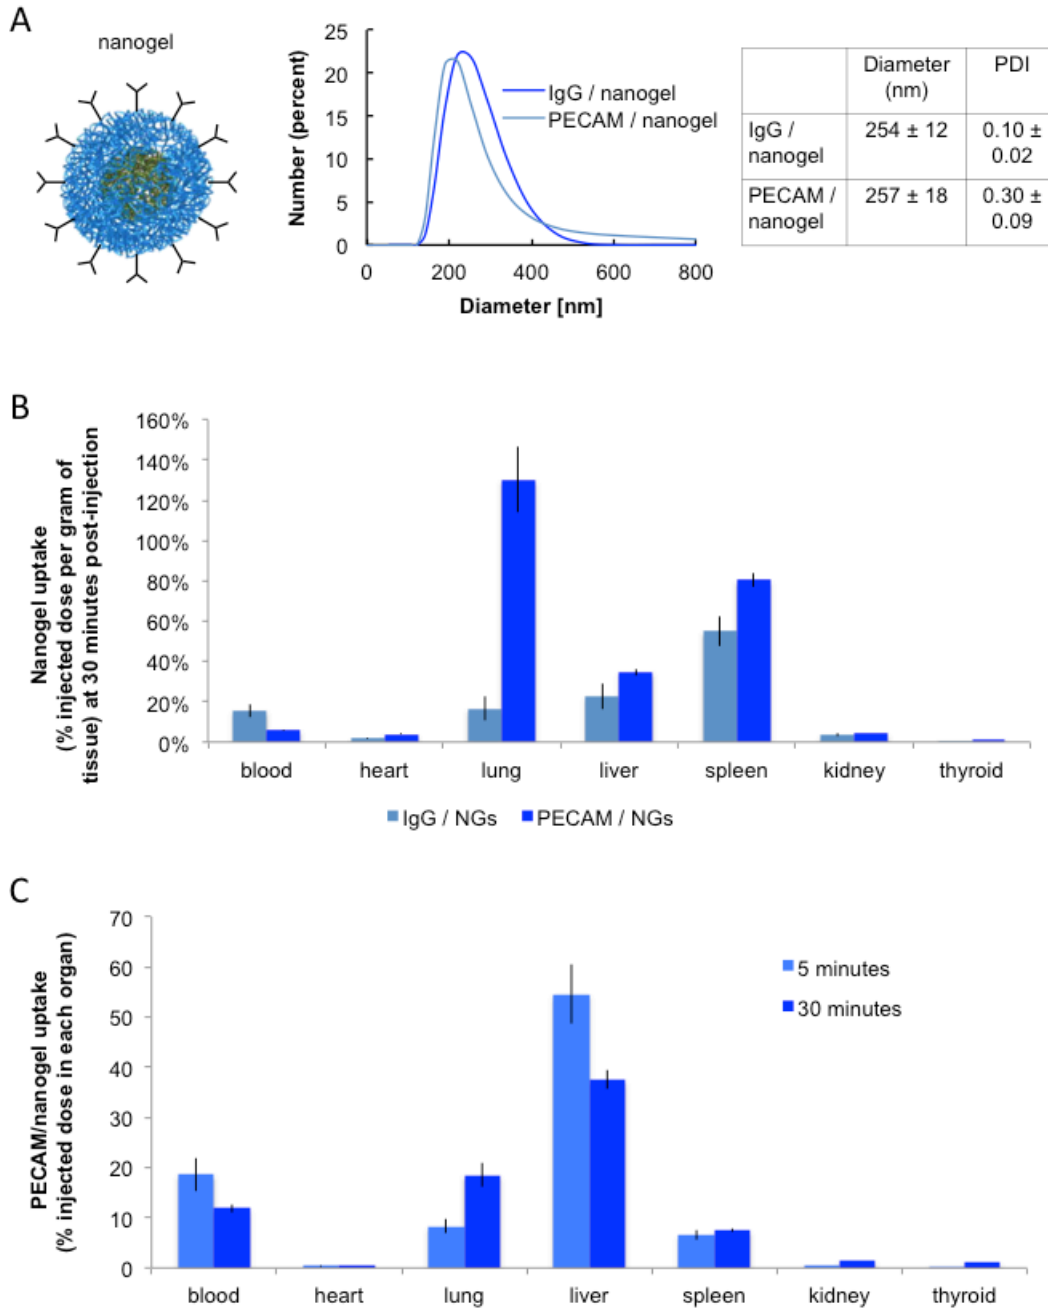

**Figure 2: Nanogel characterization, biodistribution, and pharmacokinetics.** (A) *Left panel*, Diagram of nanogels. *Middle panel*, histogram of nanogel size, as measured by DLS. *Right panel*, statistics of size histogram in the middle panel. (B) Biodistribution of PECAM- vs control IgG-targeted nanogels in healthy (naïve) mice, plotted as %ID/g (percent of injected dose per gram of tissue). (C) Biodistribution of PECAM/nanogels as function of the time between injection of liposomes and harvesting of organs (5 minutes to 30 minutes). Mice were healthy (naïve).
